# Supplementary material
Source: publisher figshare collection journal article supplement (https://brill.figshare.com/ndownloader/files/36476487)
Supplement: Supplementary file 1 [file 36476487]

## Sheet: Supplementary Table S3
Gene region	Primer combination (F/R)	Product length (bp)	Annealing temp. (°C)	Annealing time (sec)	Extention time (sec)
COI	TY-J-1460-Spilo / TL2-N-3014-Spilo	1550	48-54	60	90
COI	LCO1490 / TL2-N-3014-Spilo	1500	48-54	60	90
COI	C1-J-1718 / TL2-N-3014-Spilo	1400	46-50	60	90
CAD (part1)	CAD_496F / CAD_782R	850	52-56	20	20
CAD (part2)	CAD4-Pyr-F / CAD_1028R	750	48-52	20	20
CAD (part2)	CAD4-Pyr-F / CAD4-Pyr-R	615	48-52	10	10
EF1α	Oscar / EFrcM4	1100	58-64	30	60
EF1α (part1)	Oscar / Bosie	750	65-68	15	15
EF1α (part2)	EF51.9 / EFrcM4	500	50-55	10	10
RpS5	RpS5f / RpS5r	600	54-58	10	10
RpS5	RpS5_01F / RpS5-01R	550	52-55	10	10
